# Supplementary material for: Genotyping by Sequencing for SNP-Based Linkage Map Construction and QTL Analysis of Chilling Requirement and Bloom Date in Peach [Prunus persica (L.) Batsch]
Source: PubMed Central journal article supplement (PMC4592218; doi:10.1371/journal.pone.0139406), 2015-10-02
Supplement: pone.0139406.s004.pdf [file pone.0139406.s004.pdf]

\*\*\*\*\*

Note: this process assumes you've got Homer (<http://biowhat.ucsd.edu/homer/>) installed and Homer's PATH information in your .bashrc

\*\*\*\*\*

Working from the directory that contains your read file (file.fastq):

```
$ cat file.fastq | perl -e '$i=0;while(<>){if(/^@\&&$i=0){s/^@\>/;print;}elsif($i=1){print;$i=-3}$i++;}' > file.fasta
```

```
$ homerTools trim -3 CAGC file.fasta
```

```
$ homerTools trim -3 CTGC file.fasta.trimmed
```

```
$ awk '0 == NR % 2' file.fasta.trimmed.trimmed > barcodes.txt  
#removes fasta identifiers and keeps only the barcode seqs
```

```
$ sed '/.\{9\}/d' barcodes.txt >barcodes_final.txt  
#this drops "barcodes" longer than 8 characters - which are likely artifacts
```

```
$ cat barcodes_final.txt |sort |uniq -c > barcode_counts
```
