# Supplementary material for: Genotyping by Sequencing for SNP-Based Linkage Map Construction and QTL Analysis of Chilling Requirement and Bloom Date in Peach [Prunus persica (L.) Batsch]
Source: PLoS One. 2015 Oct 2;10(10):e0139406. doi: 10.1371/journal.pone.0139406 (PMC4592218; doi:10.1371/journal.pone.0139406)
Supplement: S2 File — (XLSX) [file pone.0139406.s005.xlsx]

## Sheet: Sheet1
SNP	This study	IGA_SNP	UCD
1_02246993	x	x
1_02358697	x	x
1_03609585	x	x
1_08420297	x	x
1_09949719	x	x
2_01929742	x	x
2_01981467	x	x
2_02114745	x	x
2_02167137	x	x
2_02465127	x	x
2_03509566	x	x
2_03509692	x	x
2_03510793	x	x
2_03629515	x	x
2_03798087	x	x
2_03894659	x	x
2_03956893	x	x
2_04029514	x	x
2_04234268	x		x
2_04277837	x	x
2_04298042	x	x
2_04316500	x	x
2_04471128	x	x
2_04516599	x	x
2_04535571	x	x
2_04653777	x	x
2_04684167	x	x
2_04905877	x	x
2_05010910	x	x
2_07093927	x	x
2_07735070	x	x
2_07816645	x	x
2_07970345	x	x
2_07972323	x	x
2_09274532	x	x
2_09280249	x	x
2_09282247	x	x
2_26078220	x		x
2_26158460	x		x
2_26162734	x		x
2_26213319	x		x
2_26256492	x	x	x
2_26283180	x	x	x
3_00398738	x		x
3_00401784	x		x
3_02040995	x	x
3_03777006	x	x
3_03903514	x	x
3_04795821	x	x
3_04806533	x	x
3_04855053	x	x
3_05659770	x	x
3_05778842	x	x
3_06228215	x	x
3_06764933	x		x
3_06788160	x	x
3_09715161	x	x
3_10109864	x	x
3_10290458	x	x
3_19536991	x		x
3_19629232	x		x
3_20244562	x		x
3_20413437	x		x
3_20774761	x	x	x
4_02890838	x		x
4_04032576	x		x
4_04601174	x	x
4_05021568	x	x
4_05063503	x	x
4_05202012	x		x
4_05209459	x	x
4_05511396	x	x
4_05669901	x	x
4_06331193	x	x
4_07258312	x	x
4_09221311	x	x
4_09885374	x	x
4_09936483	x	x
4_10901127	x		x
4_11060745	x		x
5_02319923	x	x
5_04704016	x	x
5_04704305	x	x
5_05663116	x	x
5_06721949	x	x
5_08769305	x	x
5_09246463	x	x
5_09634490	x	x
5_09817988	x	x	x
5_10192138	x	x
5_13730460	x		x
5_13735624	x		x
5_13853757	x		x
6_02750075	x	x
6_02909801	x	x
6_03337158	x	x
6_04333481	x	x
6_04620420	x	x
6_04759712	x	x
6_06034852	x	x
6_07538126	x	x
6_07604716	x	x
6_10073293	x	x
6_10222941	x	x
6_12634569	x		x
6_26090466	x	x	x
7_00513876	x		x
7_02740770	x	x
7_04563831	x	x
7_04602848	x	x
7_05229703	x		x
7_05844521	x		x
7_06339792	x	x
7_06574477	x	x
7_06575337	x	x
7_06656846	x	x
7_06681332	x	x
7_06715378	x	x
7_07997807	x	x
7_08009022	x	x
7_08183215	x	x
7_09998983	x	x
7_10067388	x	x	x
7_10150008	x	x
7_10372774	x	x
7_10372969	x	x
7_16774185	x		x
7_20598558	x		x
8_01936674	x	x
8_03320018	x	x
8_04316478	x	x
8_06211537	x	x
8_08030524	x	x
8_10267543	x	x
8_16729647	x	x	x
